# Supplementary material
Source: PubMed Central journal article supplement (PMC5527873)
Supplement: MOL2-3-54-s001.pdf [file MOL2-3-54-s001.pdf]

**Supplement Table 1**

Primer pairs for real-time quantitative RT-PCR

| Target gene       | Forward primer<br>(5'→3')  | Reverse primer<br>(5'→3')  |
|-------------------|----------------------------|----------------------------|
| ZO-1              | TGCCCAGTGGTATCCAATTGT      | TGGACATAACCTCATTCTCATTGTTT |
| E-cadherin        | ACAGCCCCGCCTTATGATT        | TCGGAACCGCTTCCTTCA         |
| keratin 18        | GCCCGCTACGCCCTACA          | TGACTCAAGGTGCAGCAGGAT      |
| keratin 19        | TGAGCGGCAGAATCAGGAGTA      | TCCAGCCGCGACTTGA           |
| β-catenin         | GGCAGGAGAATCGCTTGAAC       | CGTACGGCGCTGGGTATC         |
| actin α1          | GCGGGCCGCGATCT             | AGGAGTAGCCACGCTCAGTGA      |
| vimentin          | AATGACCGCTTCGCCAACT        | ATCTTATTCTGCTGCTCCAGGAA    |
| collagen type I   | CAGGAAGGGCCACGACAAA        | GCGGCACAAGGGATTGAC         |
| collagen type I V | CGTAACTAACACACCCTGCTTCAT   | CACTATTGAAAGCTTATCGCTGTCTT |
| CD44              | TCCTGAAGACTTCCCTTAAAATTAGC | GGATTTCGAAGATGTCTTTTGTCTCT |
| PLAUR             | GCCGTTACCTCGAATGCATT       | GGCCCCCTCACAGCTCAT         |
| Met               | CTGCCAGCGACATGTCTTTC       | AATATGCAGTGAACCTCCGACTGT   |
| SLUG              | CTTTTTTTGATTACCTGTAGTGCTT  | ACATTCTCCTGTGTTTTGTTCTTGT  |
| SNAIL             | CCCGGGCAATTTAACAATGT       | TTGGGCCCCCCGACAAG          |
| TWIST1            | GGATCAAACCTGGCCTGCAAA      | CCCTCAGAGGAAGGATGAAAAA     |
| ZEB1              | CCCATAGTGGTTGCTTCAGGAA     | CCAGTGAAAACCCCATTTTGTAA    |
| ZEB2              | GGCCCGTTTGTAACTTGCA        | CCCGCTGCCCGAATC            |
| GAPDH             | CAAGGCTGTGGGCAAGGT         | GGAAGGCCATGCCAGTGA         |
